# Supplementary material
Source: Springer Nature journal article supplement (https://www.springermedizin.de/resource/supplementary/12885_2008_1166_MOESM6_ESM.pdf/9471284)

**A – Lung (week 3)**

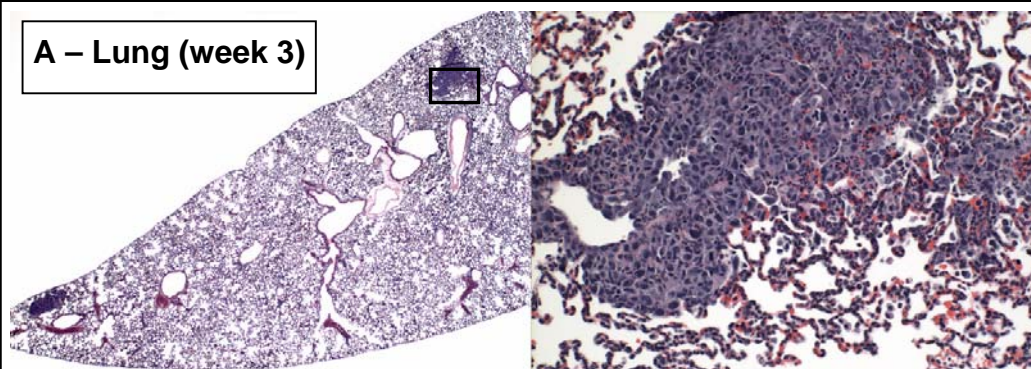

**B – Kidney (week 6)**

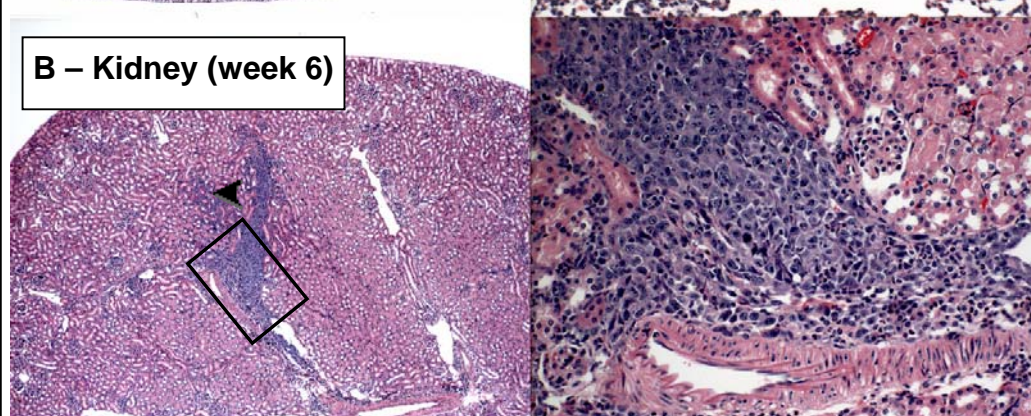

**C – Adrenal (week 6)**

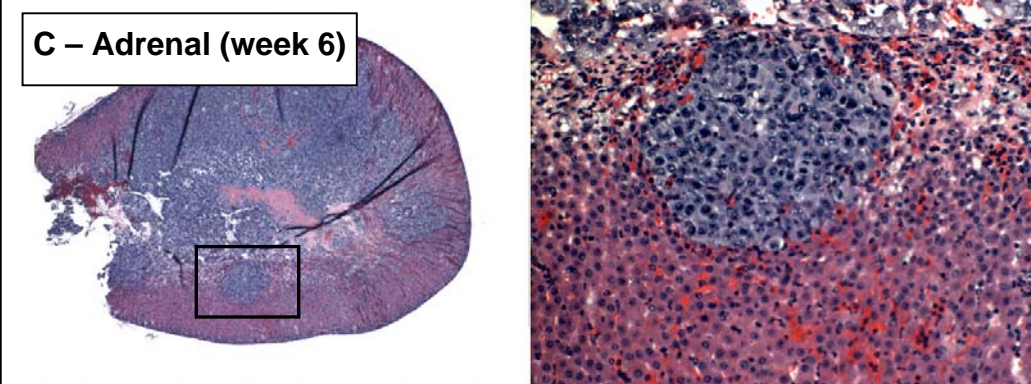

**D – Liver (week 6)**

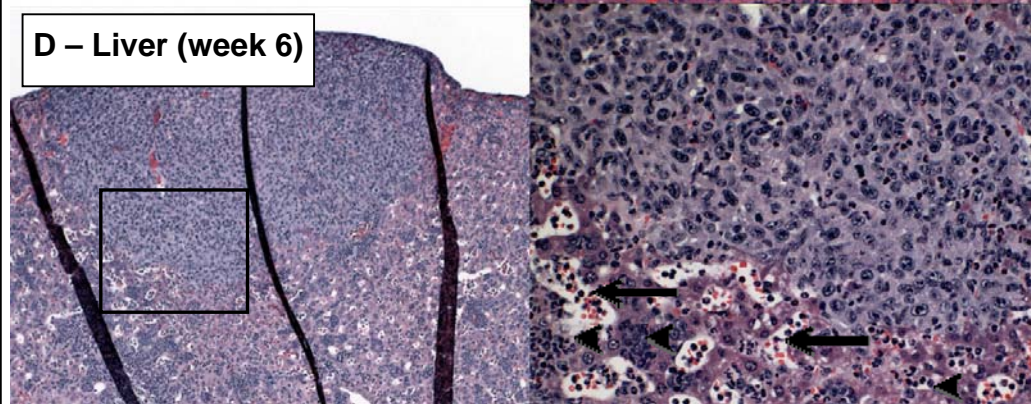

Supplement: MOESM6 [file 9471284]
